# Supplementary material for: Counter anions influence the relaxation dynamics of phenoxy-bridged Dy2 single molecule magnets
Source: Royal Society of Chemistry journal article supplement (doi:10.1039/d0dt02451a), 2020-01-01
Supplement: d0dt02451a1.pdf [file d0dt02451a1.pdf]

## Supporting Information

### Counter anions influence the relaxation dynamics of phenoxy- bridged Dy<sub>2</sub> single molecule magnets

Shuting Liu,<sup>a,b</sup> Jingjing Lu,<sup>a</sup> Xiao-lei Li,<sup>a</sup> Zhenhua Zhu<sup>a,c</sup> and Jinkui Tang<sup>\*a,b</sup>

*<sup>a</sup>State Key Laboratory of Rare Earth Resource Utilization, Changchun Institute of Applied Chemistry, Chinese Academy of Sciences, Changchun 130022, P. R. China*

*<sup>b</sup>School of Applied Chemistry and Engineering, University of Science and Technology of China, Hefei 230026, P. R. China*

*<sup>c</sup>University of Chinese Academy of Sciences, Beijing 100049, P. R. China*

Corresponding Author: Jinkui Tang

E-mail: tang@ciac.ac.cn

**Table S1.** Crystallographic Data and Structure Refinement for **1-4**.

| Compound                                 | <b>1</b>                                                                                        | <b>2</b>                                                                        | <b>3</b>                                                                                        | <b>4</b>                                                                                                                         |
|------------------------------------------|-------------------------------------------------------------------------------------------------|---------------------------------------------------------------------------------|-------------------------------------------------------------------------------------------------|----------------------------------------------------------------------------------------------------------------------------------|
| Formula                                  | C <sub>53</sub> H <sub>60</sub> Cl <sub>2</sub> Dy <sub>2</sub> N <sub>12</sub> O <sub>15</sub> | C <sub>55</sub> H <sub>63</sub> Dy <sub>2</sub> N <sub>14</sub> O <sub>21</sub> | C <sub>57</sub> H <sub>70</sub> Cl <sub>2</sub> Dy <sub>2</sub> N <sub>12</sub> O <sub>24</sub> | C <sub>120</sub> H <sub>133</sub> Cl <sub>2</sub> Dy <sub>4</sub> F <sub>12</sub> N <sub>24</sub> O <sub>39</sub> S <sub>4</sub> |
| Formula weight                           | 1501.03                                                                                         | 1581.19                                                                         | 1703.15                                                                                         | 3612.64                                                                                                                          |
| Temperature/K                            | 173.15                                                                                          | 173.15                                                                          | 173.15                                                                                          | 173.15                                                                                                                           |
| Crystal system                           | monoclinic                                                                                      | monoclinic                                                                      | monoclinic                                                                                      | triclinic                                                                                                                        |
| Space group                              | <i>P</i> 2 <sub>1</sub> / <i>c</i>                                                              | <i>P</i> 2 <sub>1</sub> / <i>c</i>                                              | <i>P</i> 2 <sub>1</sub> / <i>n</i>                                                              | <i>P</i> $\bar{1}$                                                                                                               |
| <i>a</i> /Å                              | 14.434(5)                                                                                       | 14.515(3)                                                                       | 14.0961(9)                                                                                      | 15.7602(13)                                                                                                                      |
| <i>b</i> /Å                              | 17.950(7)                                                                                       | 18.063(4)                                                                       | 18.9669(12)                                                                                     | 18.2693(15)                                                                                                                      |
| <i>c</i> /Å                              | 26.051(9)                                                                                       | 27.276(7)                                                                       | 26.3438(18)                                                                                     | 24.804(2)                                                                                                                        |
| $\alpha$ /°                              | 90                                                                                              | 90                                                                              | 90                                                                                              | 95.9670(10)                                                                                                                      |
| $\beta$ /°                               | 93.072(8)                                                                                       | 92.250(5)                                                                       | 104.9210(10)                                                                                    | 100.081(2)                                                                                                                       |
| $\gamma$ /°                              | 90                                                                                              | 90                                                                              | 90                                                                                              | 90.9640(10)                                                                                                                      |
| Volume/Å <sup>3</sup>                    | 6740(4)                                                                                         | 7146(3)                                                                         | 6805.8(8)                                                                                       | 6989.1(10)                                                                                                                       |
| <i>Z</i>                                 | 4                                                                                               | 4                                                                               | 4                                                                                               | 2                                                                                                                                |
| $\rho_{\text{calc}}$ /g·cm <sup>-3</sup> | 1.479                                                                                           | 1.470                                                                           | 1.662                                                                                           | 1.717                                                                                                                            |
| F(000)                                   | 2992                                                                                            | 3164                                                                            | 3416                                                                                            | 3606                                                                                                                             |
| Crystal size/mm <sup>3</sup>             | 0.12×0.11×0.1                                                                                   | 0.12×0.11×0.1                                                                   | 0.2×0.15×0.1                                                                                    | 0.15×0.12×0.1                                                                                                                    |
| Reflns collected                         | 41046                                                                                           | 39282                                                                           | 26112                                                                                           | 43444                                                                                                                            |
| Rint                                     | 0.0812                                                                                          | 0.1037                                                                          | 0.0447                                                                                          | 0.027                                                                                                                            |
| GOF on F <sup>2</sup>                    | 1.031                                                                                           | 0.995                                                                           | 1.107                                                                                           | 1.027                                                                                                                            |
| R1, wR2 [ <i>I</i> ≥2σ( <i>I</i> )]      | 0.0657, 0.1855                                                                                  | 0.0586, 0.1368                                                                  | 0.0582, 0.1517                                                                                  | 0.0400, 0.1099                                                                                                                   |
| R1, wR2 [all data]                       | 0.0887, 0.2011                                                                                  | 0.0932, 0.1544                                                                  | 0.0729, 0.1595                                                                                  | 0.0479, 0.1168                                                                                                                   |
| CCDC number                              | 2004686                                                                                         | 2004687                                                                         | 2004688                                                                                         | 2004689                                                                                                                          |

**Table S2.** CShM Values of **1-4**.

| central atom                                  | coordination polyhedron                       | <b>1</b>     | <b>2</b>     | <b>3</b>     | <b>4</b>     |
|-----------------------------------------------|-----------------------------------------------|--------------|--------------|--------------|--------------|
| Dy(1)                                         | Square antiprism (SAPR-8, D4d)                | 4.253        | 4.009        | 4.275        | 4.112        |
|                                               | Triangular dodecahedron (TDD-8, D2d)          | <b>3.447</b> | <b>3.499</b> | <b>3.844</b> | <b>3.895</b> |
| Biaugmented trigonal prism J50 (JBTPR-8, C2v) | Biaugmented trigonal prism J50 (JBTPR-8, C2v) | 4.839        | 4.762        | 4.793        | 4.934        |
|                                               | Biaugmented trigonal prism (BTPR-8, C2v)      | 3.952        | 3.76         | 3.943        | 4.157        |
|                                               | Snub diphenoid J84 (JSD-8, D2d)               | 5.684        | 5.775        | 5.823        | 5.872        |
|                                               | Snub diphenoid J84 (JSD-8, D2d)               | 6.262        | 5.854        | 6.088        | 6.346        |
| Dy(2)                                         | Square antiprism (SAPR-8, D4d)                | 4.335        | 4.361        | 4.26         | 4.592        |
|                                               | Triangular dodecahedron (TDD-8, D2d)          | 4.455        | 4.061        | 4.118        | 4.556        |
|                                               | Biaugmented trigonal prism J50 (JBTPR-8, C2v) | 5.144        | 5.214        | 5.221        | 5.342        |
|                                               | Biaugmented trigonal prism (BTPR-8, C2v)      | 4.32         | 4.533        | 4.451        | 4.549        |

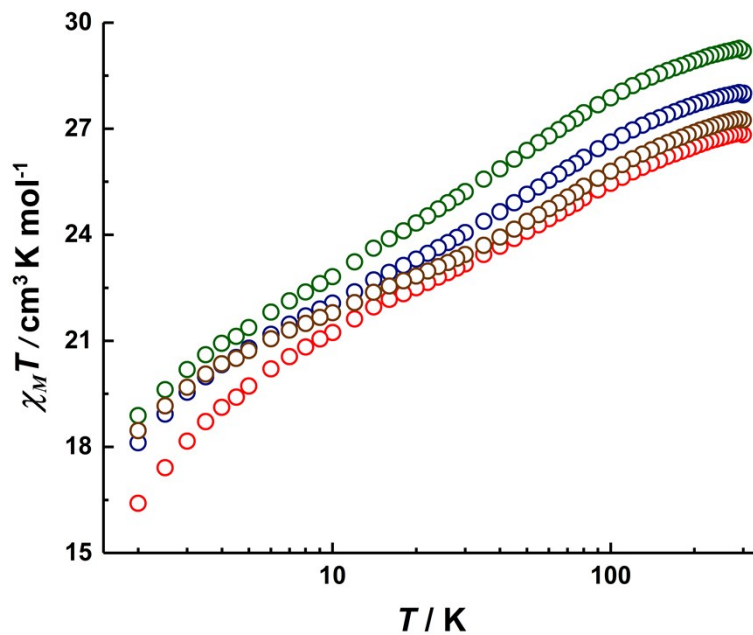

**Figure S1.** Temperature dependence of the  $\chi_M T$  values at 1000 Oe for **1** (red), **2** (blue), **3** (green) and **4** (brown) with the x axis in log scale to highlight the low temperature magnetic properties.

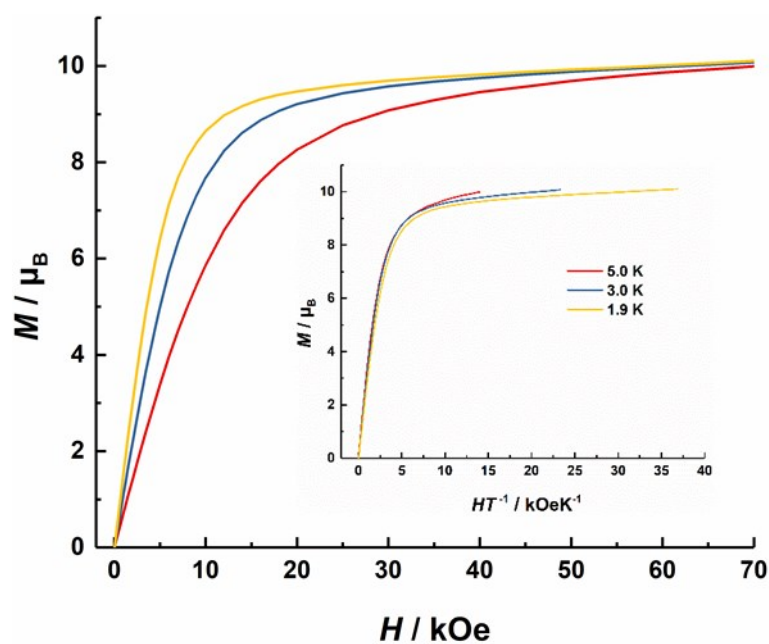

**Figure S2.** Field dependence of magnetization for **1**. Inset:  $M$  versus  $H/T$  plot for **1**.

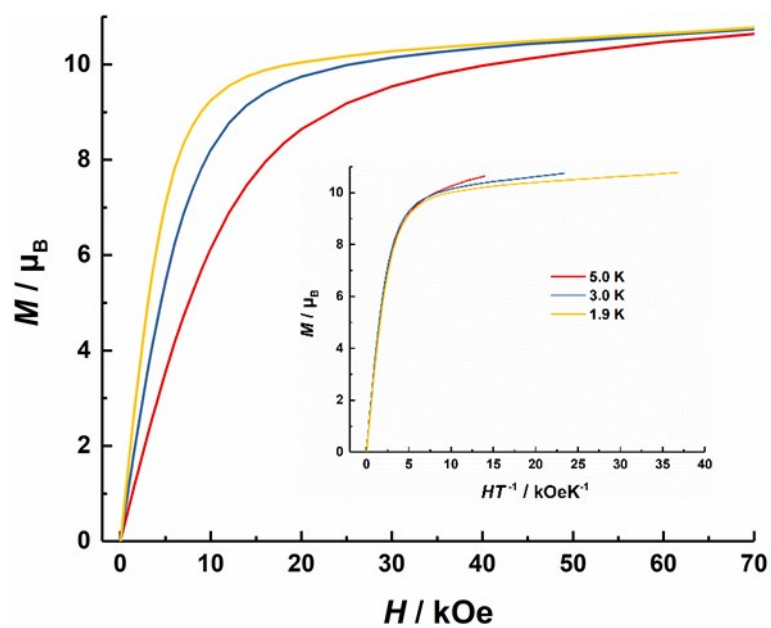

**Figure S3.** Field dependence of magnetization for **2**. Inset:  $M$  versus  $H/T$  plot for **2**.

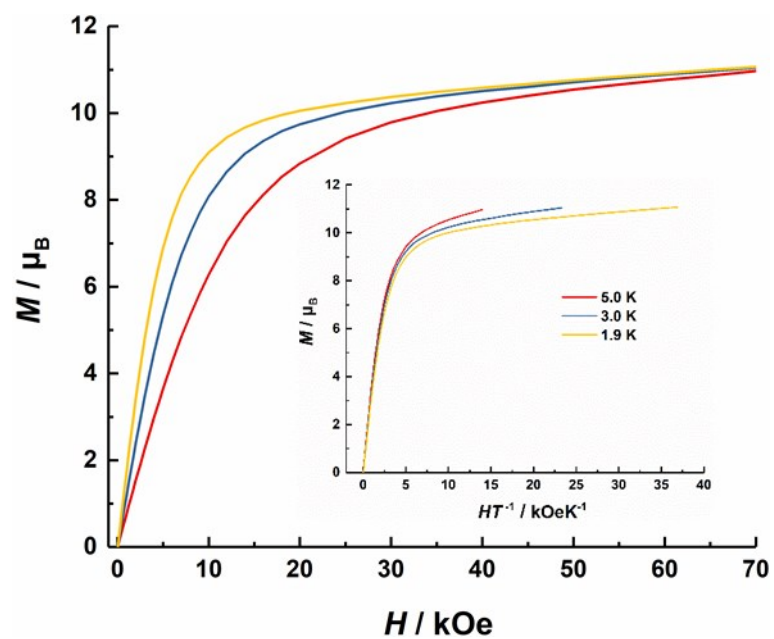

**Figure S4.** Field dependence of magnetization for **3**. Inset:  $M$  versus  $H/T$  plot for **3**.

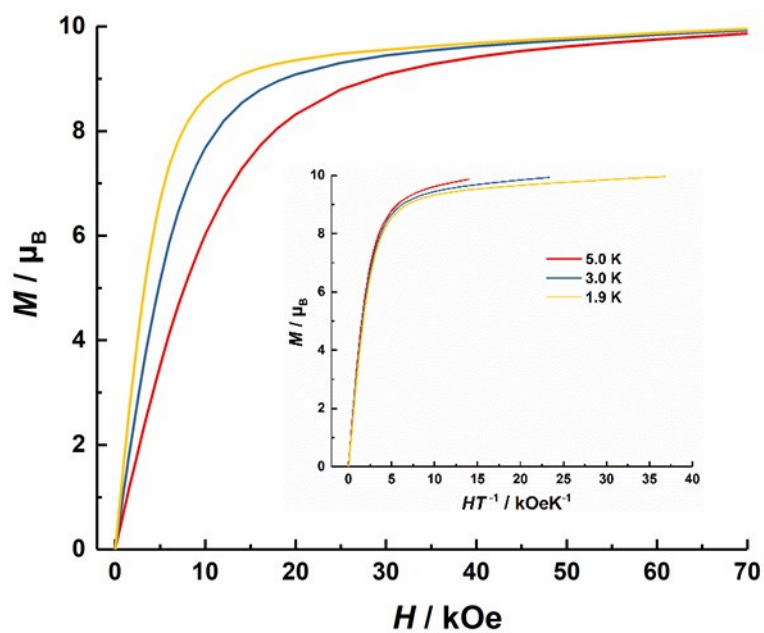

**Figure S5.** Field dependence of magnetization for **4**. Inset:  $M$  versus  $H/T$  plot for **4**.

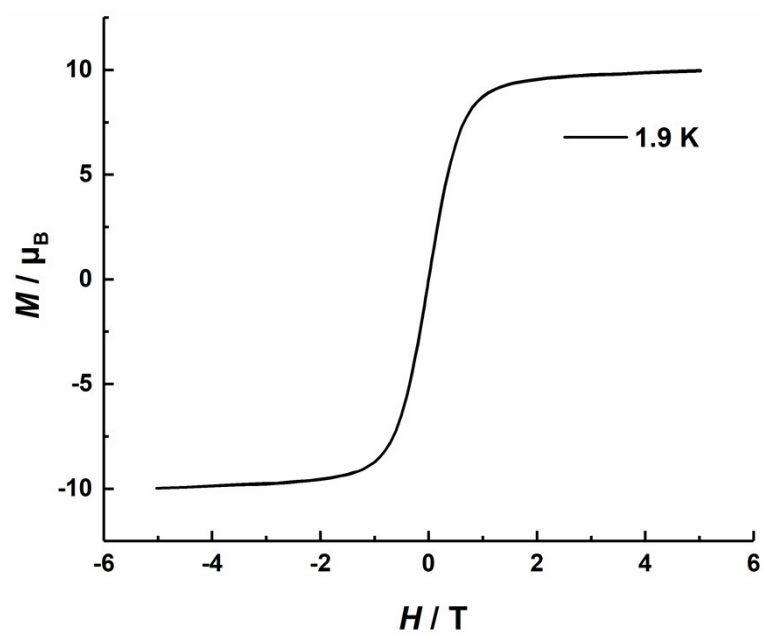

**Figure S6.** Variable magnetic field magnetization measurement for **1** at 1.9 K.

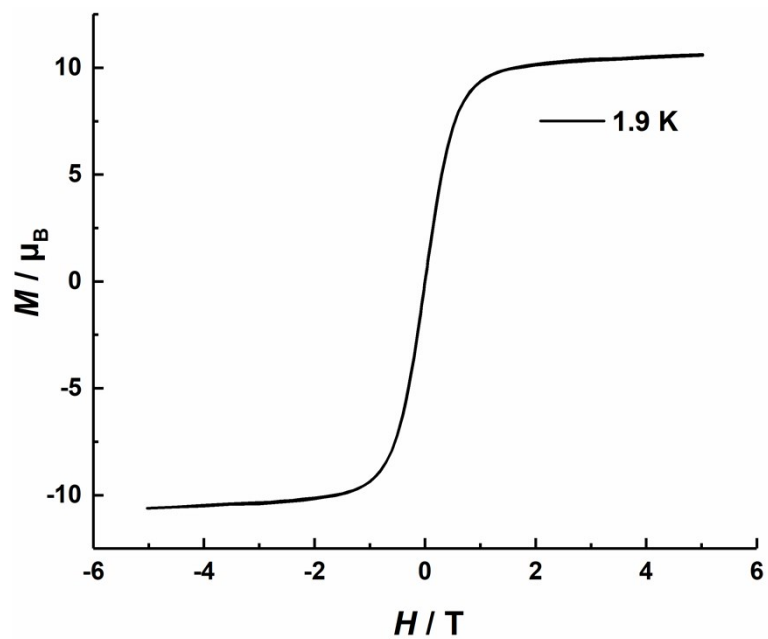

**Figure S7.** Variable magnetic field magnetization measurement for **2** at 1.9 K.

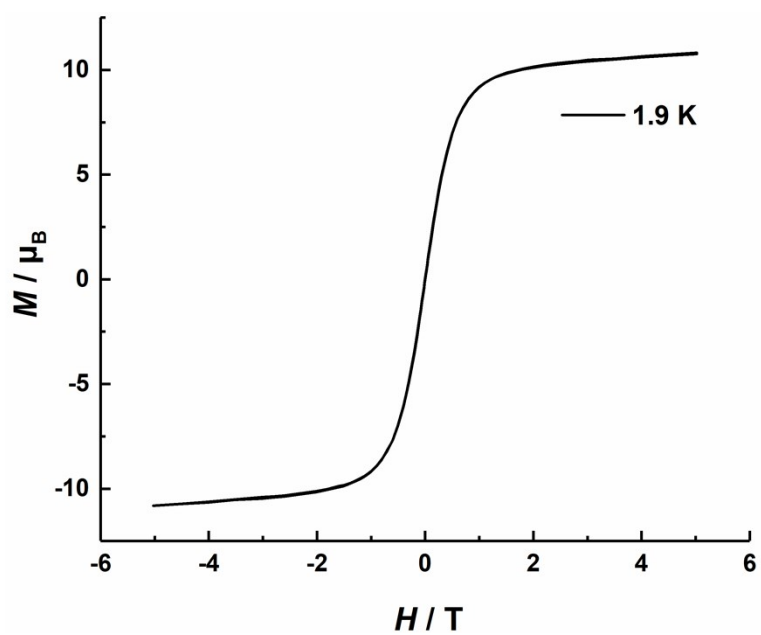

**Figure S8.** Variable magnetic field magnetization measurement for **3** at 1.9 K.

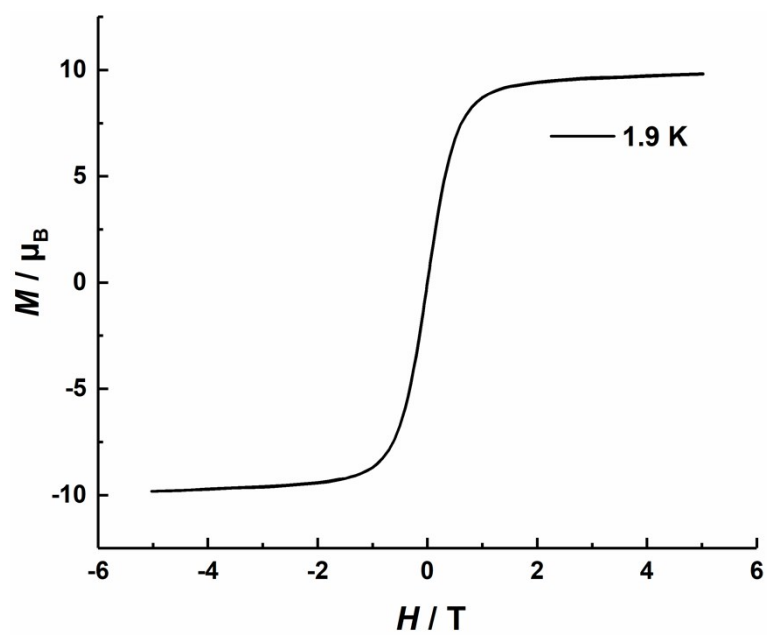

**Figure S9.** Variable magnetic field magnetization measurement for **4** at 1.9 K.

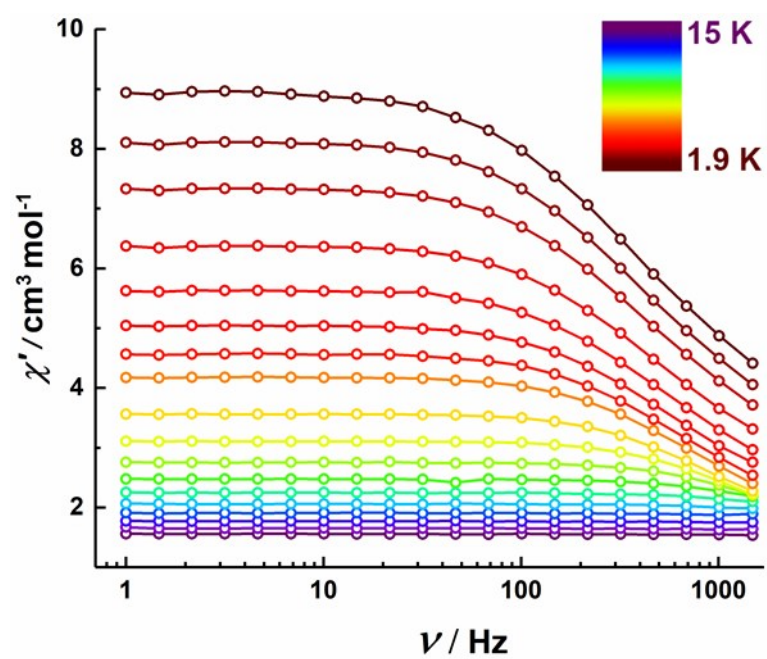

**Figure S10.** Frequency dependence under zero dc field of the in-phase ac susceptibility component at indicated temperature for **1**.

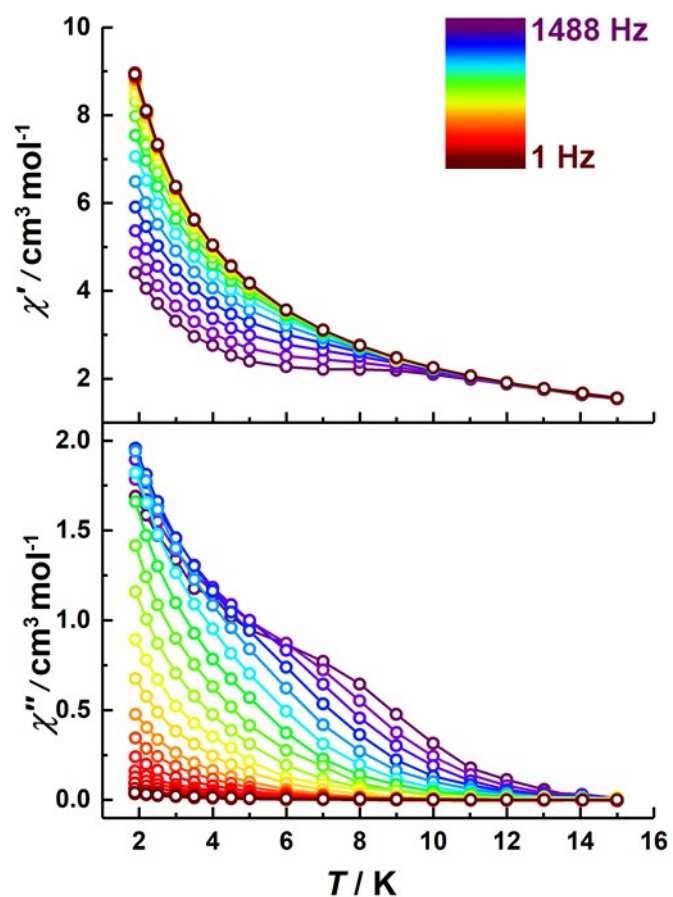

**Figure S11.** Temperature dependence under zero dc field of the in-phase (top) and the out-of-phase (bottom) ac susceptibility component at indicated ac frequency for **1**.

**Table S3.** Parameters Gained From the Fitting of Relaxation Time ( $\tau$ ) Versus Temperature ( $T^{-1}$ ) Plots for **1**, **2** and **4**. For **3**, Parameters Gained From the e.q. (3).

| <i>compound</i> | $U_{eff}/\text{K}$ | $\tau_0/\text{s}$     | $\tau_{OTM}/\text{s}$ | $A/\text{s}^{-1}\text{K}^{-1}$ | $C/\text{s}^{-1}\text{K}^{-n}$ | $n$ |
|-----------------|--------------------|-----------------------|-----------------------|--------------------------------|--------------------------------|-----|
| <b>1</b>        | 45.1               | $4.97 \times 10^{-7}$ | $6.1 \times 10^{-4}$  | /                              | $7.8 \times 10^{-6}$           | 9.0 |
| <b>2</b>        | 44.2               | $4.14 \times 10^{-6}$ | $1.4 \times 10^{-3}$  | 258                            | 0.34                           | 5.4 |
| <b>3</b>        | 1.3                | $2.79 \times 10^{-5}$ | /                     | /                              | /                              | /   |
| <b>4</b>        | 56.2               | $6.15 \times 10^{-6}$ | $2.0 \times 10^{-3}$  | 49                             | 0.3                            | 4.8 |



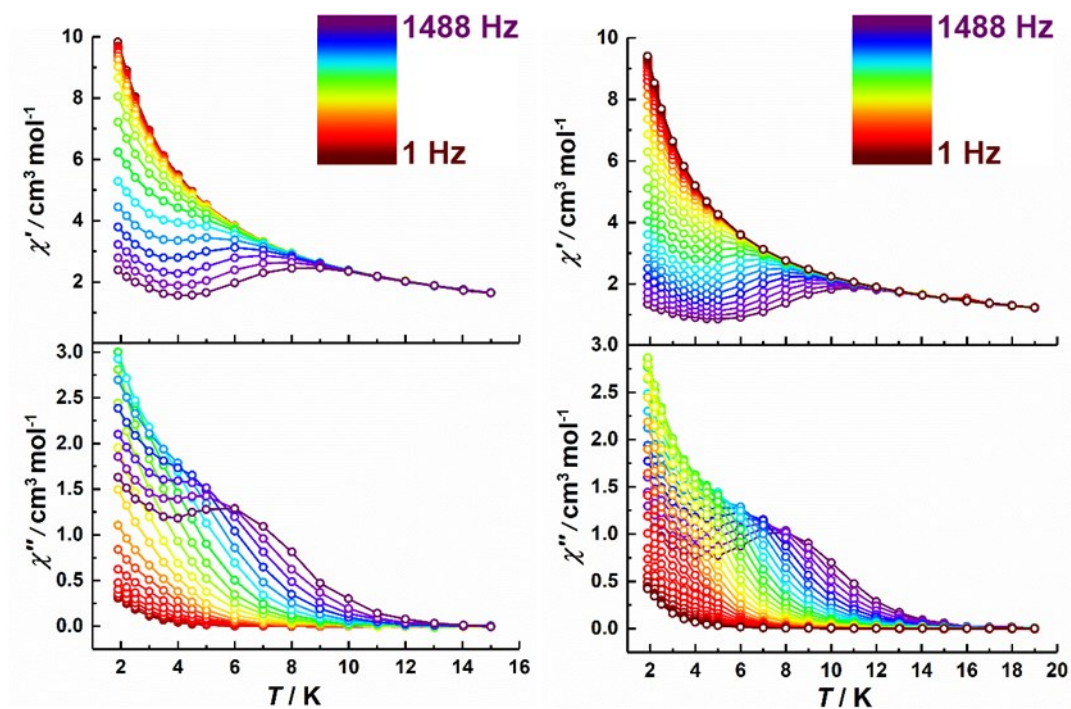

**Figure S12.** Temperature dependence under 500 (left) and 600 (right) Oe dc field of the in-phase (top) and the out-of-phase (bottom) ac susceptibility component at indicated ac frequency for **2** (left) and **4** (right).

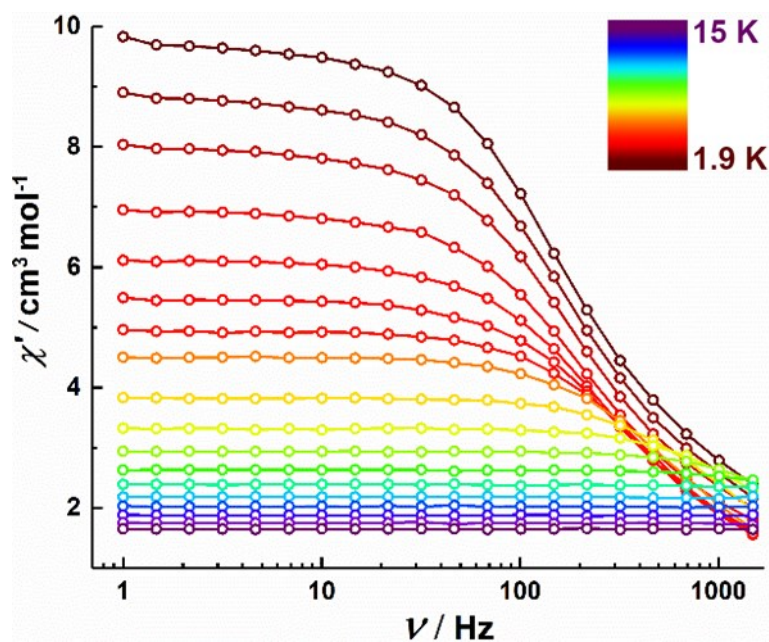

**Figure S13.** Frequency dependence under 600 Oe dc field of the in-phase ac susceptibility component at indicated temperature for **2**.

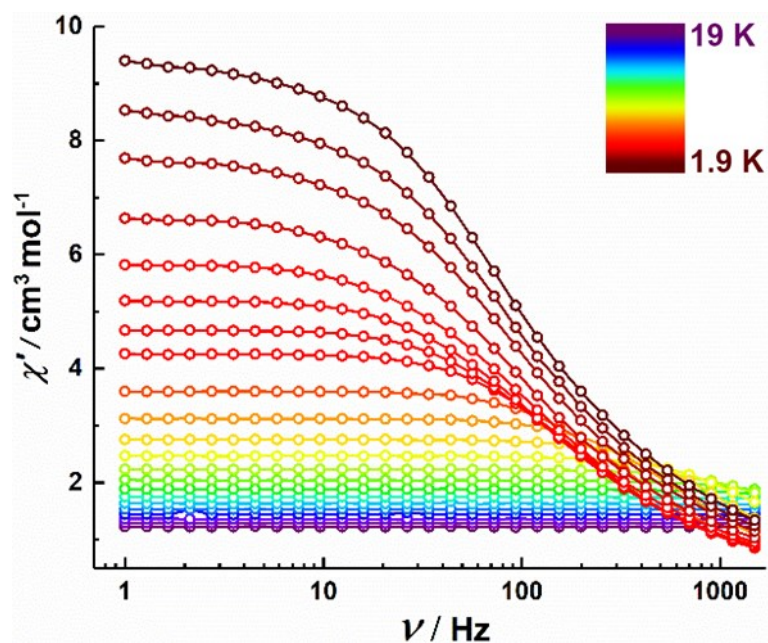

**Figure S14.** Frequency dependence under 500 Oe dc field of the in-phase ac susceptibility component at indicated temperature for 4.

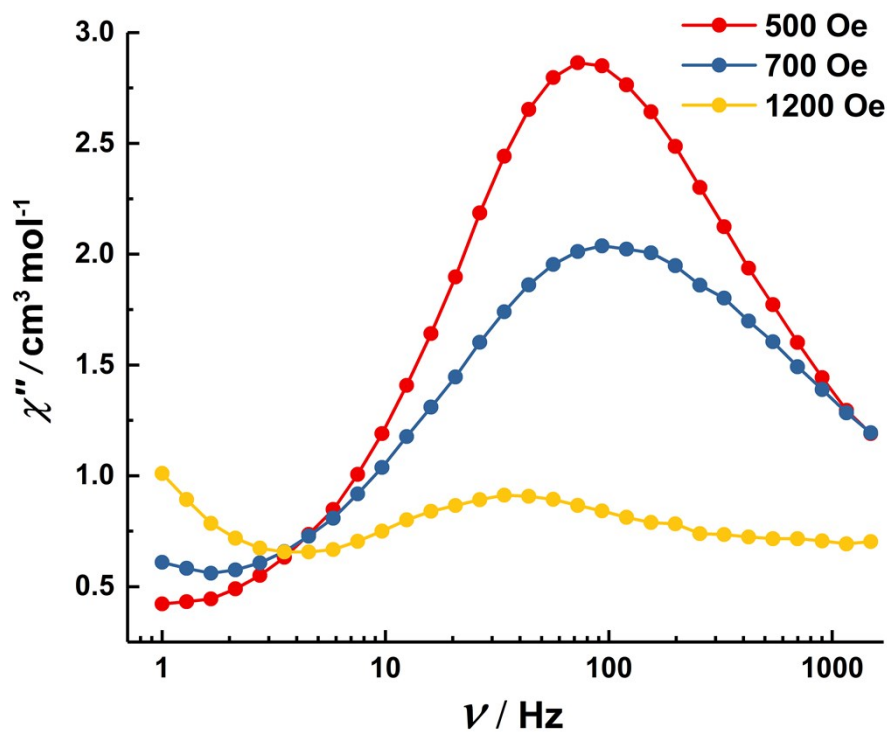

**Figure S15.**  $\chi''$  versus  $\nu$  plot at 1.9 K under various applied dc field for 4.

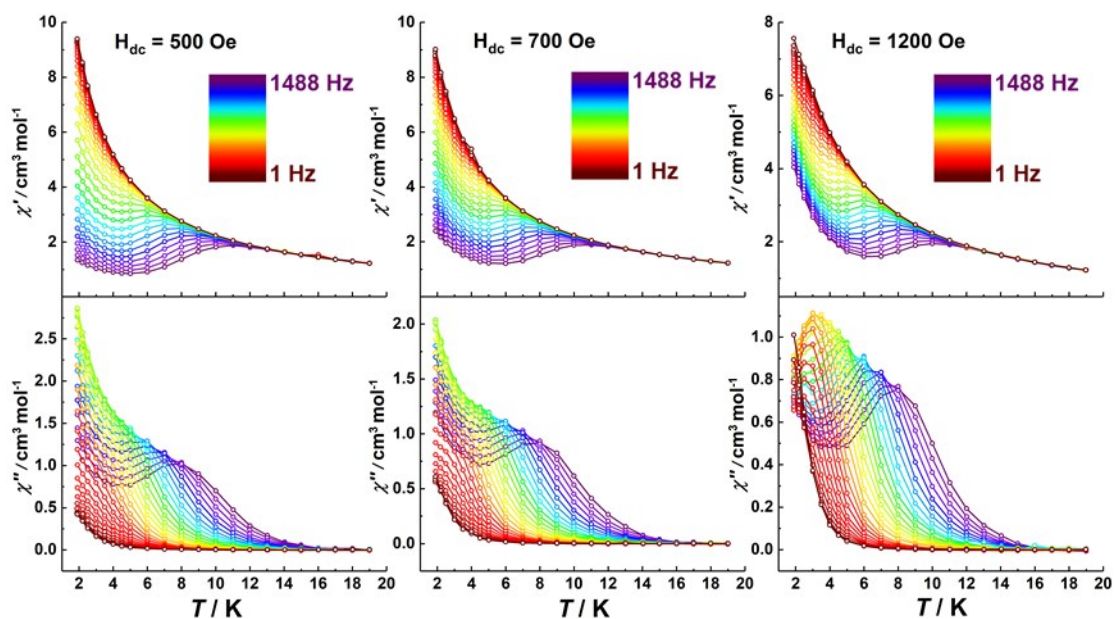

**Figure S16.** Temperature dependence under 500 (left), 700 (middle) and 1200 (right) Oe dc field of the in-phase (top) and the out-of-phase (bottom) ac susceptibility component at indicated ac frequency for **4**.

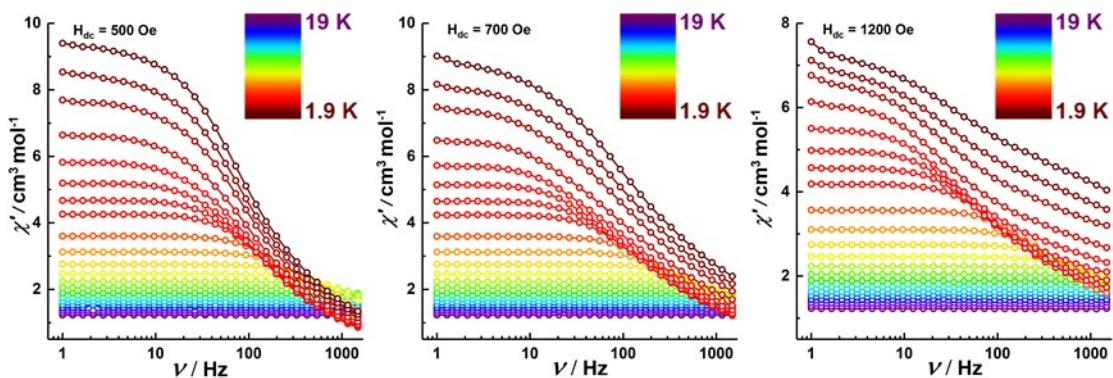

**Figure S17.** Frequency dependence under 500 (left), 700 (middle) and 1200 (right) Oe dc field of the in-phase ac susceptibility component at indicated temperature for **4**.

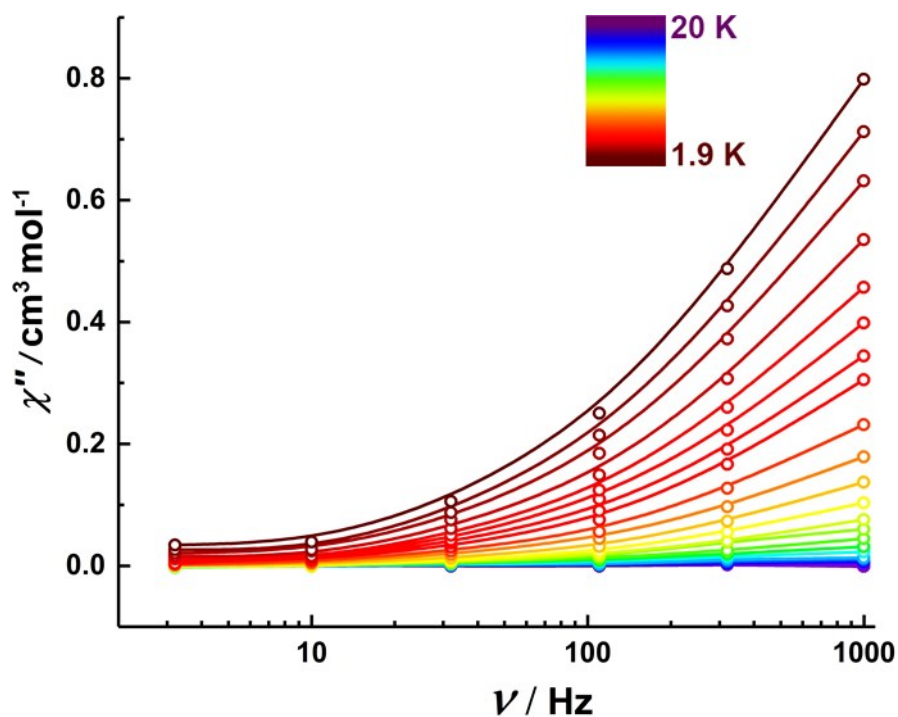

**Figure S18.** Frequency dependence under zero dc field of the out-of-phase ac susceptibility component at indicated temperature for **3**.

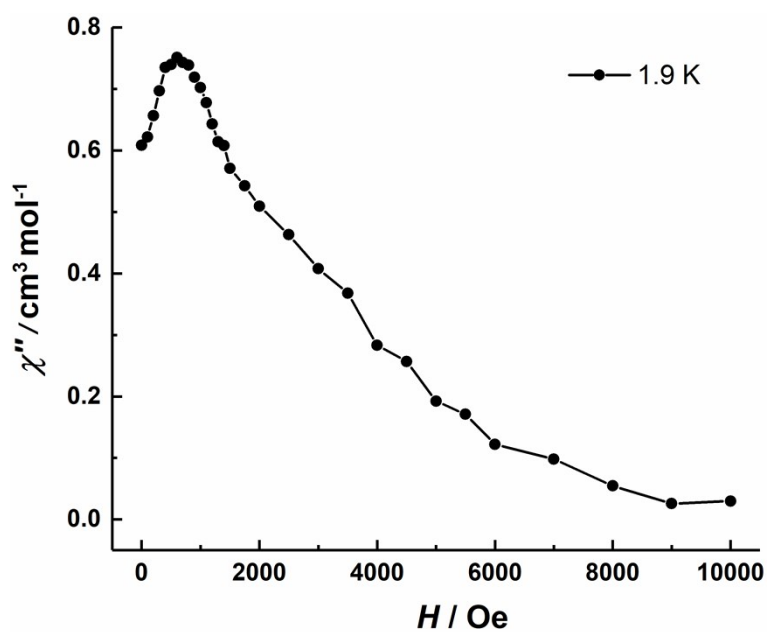

**Figure S19.** Field dependence of out-of-phase ac susceptibilities for **3** at 1.9 K, 997 Hz.

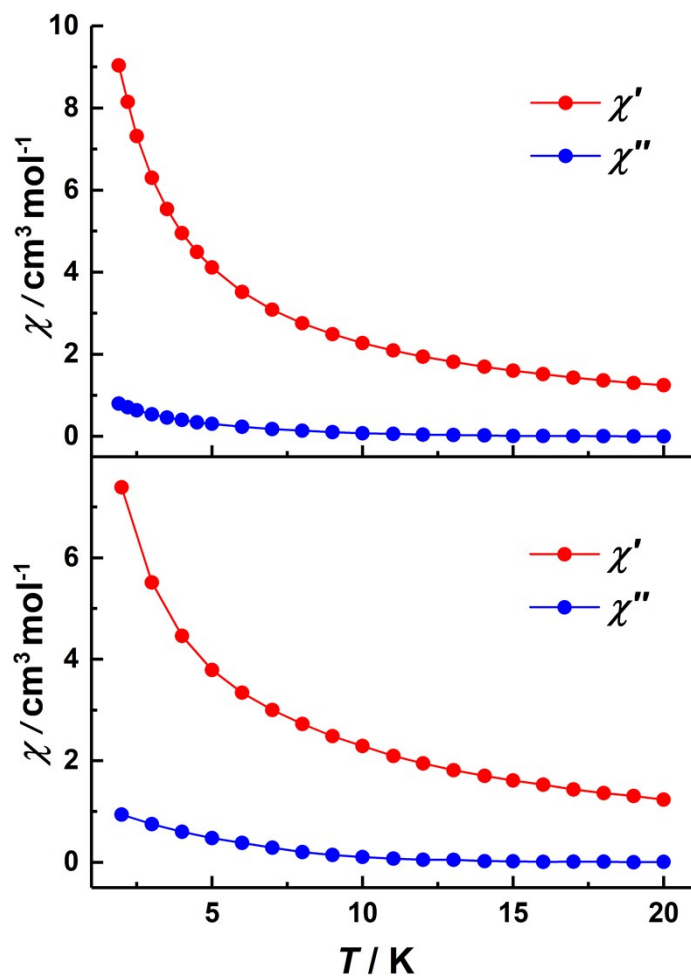

**Figure S20.** Temperature dependence under 0 (top) and 600 (bottom) Oe dc field of the in-phase (red) and the out-of-phase (blue) ac susceptibility component at 997 Hz for **3**.

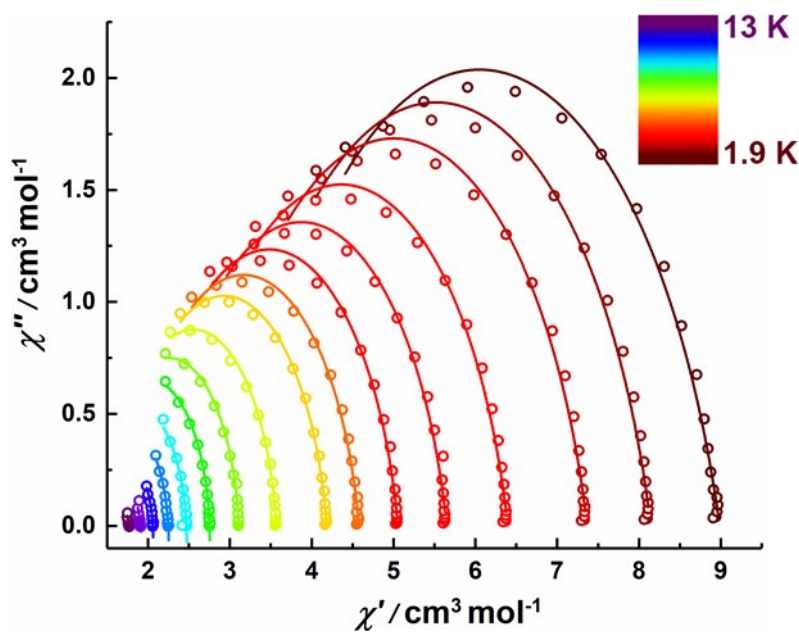

**Figure S21.** Cole-Cole plot for **1** at 1.9-13 K under zero dc field. The solid lines stand

for the best fit using a generalized Debye model.

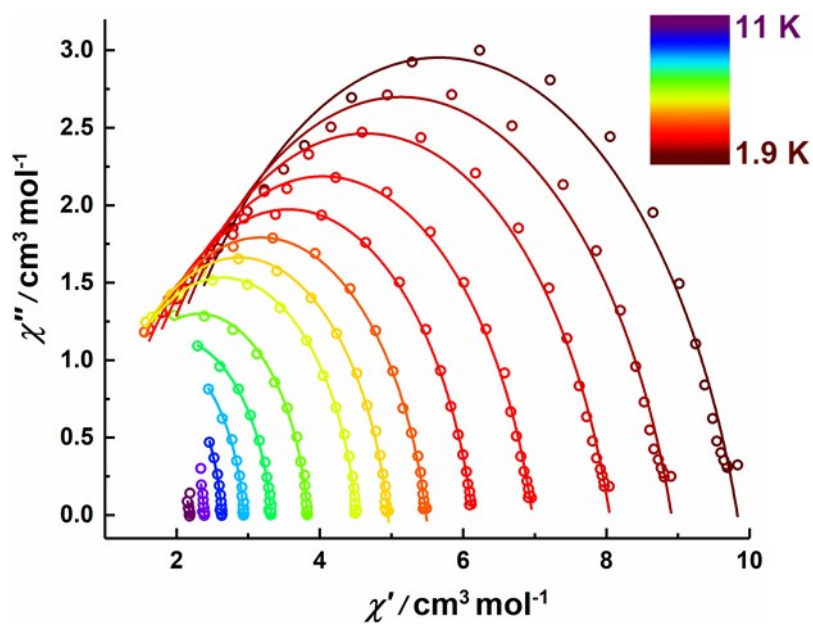

**Figure S22.** Cole-Cole plot for **2** at 1.9-11 K under 600 Oe applied dc field. The solid lines stand for the best fit using a generalized Debye model.

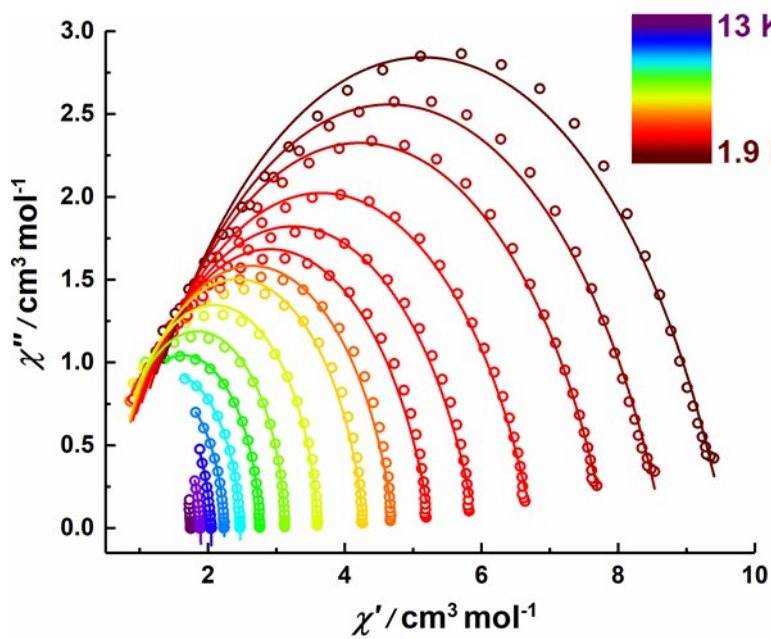

**Figure S23.** Cole-Cole plot for **4** at 1.9-13 K under 500 Oe applied dc field. The solid lines stand for the best fit using a generalized Debye model.
